# Supplementary material for: In situ synthesis of amorphous titanium dioxide supported RuO2as a carbon-free cathode for non-aqueous Li–O2batteries
Source: Royal Society of Chemistry journal article supplement (doi:10.1039/c6ra16645h), 2016-01-01
Supplement: c6ra16645h1.pdf [file c6ra16645h1.pdf]

## Supplementary Information

### ***In Situ* Synthesis of Amorphous Titanium Dioxide Supported RuO<sub>2</sub> as a Carbon-free Cathode for Non-aqueous Li-O<sub>2</sub> Batteries**

Jisu Kim,<sup>a,b</sup> Yeon Kim,<sup>a,c</sup> Mihye Wu,<sup>a\*</sup> Dae-Ho Yoon,<sup>b</sup> Yongku Kang,<sup>a,d</sup> and Ha-Kyun Jung<sup>a,d\*</sup>

<sup>a</sup>Advanced Materials Division, Korea Research Institute of Chemical Technology, 141 Gajeongro, Yuseong, Daejeon 34114, Korea

<sup>b</sup>School of Advanced Materials Science and Engineering, Sungkyunkwan University, Suwon 16419, Korea

<sup>c</sup>Department of Material Science and Engineering, Hanyang University, Seoul 04763, Korea

<sup>d</sup>Department of Chemical Convergence Materials, Korea University of Science and Technology (UST), 217 Gajeongro, Yuseong, Daejeon 34113, Korea

\*Corresponding author

Mihye Wu, Tel.: +82-42-860-7311, E-mail: [wumihye@kriict.re.kr](mailto:wumihye@kriict.re.kr)

Ha-Kyun Jung, Tel.: +82-42-860-7312, E-mail: [hakyun@kriict.re.kr](mailto:hakyun@kriict.re.kr)

## Experimental details

### Preparation of TiO<sub>2</sub>/RuO<sub>2</sub> composites

TiO<sub>2</sub>/RuO<sub>2</sub> composites were prepared by a simple sol-gel method using TiOSO<sub>4</sub> (titanium (IV) oxide sulfate sulfuric acid hydrate, TiOSO<sub>4</sub>·xH<sub>2</sub>O + H<sub>2</sub>SO<sub>4</sub>, Alfa Aesar), RuCl<sub>3</sub>·xH<sub>2</sub>O (ruthenium chloride hydrate, ReagentPlus®, Sigma-Aldrich), NH<sub>4</sub>OH (ammonium hydroxide, 28.0-30.0%, Junsei Chemical) and urea (ACS reagent, 99.0-100.5%, Sigma-Aldrich). The *in situ* synthesis process is as following: 2.5 g of TiOSO<sub>4</sub> was dissolved in 250 ml of D.I. water with vigorous stirring to get a transparent solution. A 0.6823 g of RuCl<sub>3</sub>·xH<sub>2</sub>O was dissolved into the above solution and stirred for 2 h, followed by the 0.1567 g of urea addition as a dispersant. Then, NH<sub>4</sub>OH was added dropwise to the above solution to obtain precipitates until the pH reached 7. The precipitates were thoroughly rinsed with D.I. water and dried in a convection oven at 120°C. The resultant precursors were annealed at 300 and 600°C for 2 h under vacuum, respectively. For *ex situ* synthesis, amorphous TiO<sub>2</sub> and crystalline RuO<sub>2</sub> were synthesized separately. To prepare amorphous TiO<sub>2</sub>, 2.5 g of TiOSO<sub>4</sub> was dissolved in 250 ml of D.I. water to obtain a transparent solution, followed by the addition of 0.1567 g of urea. White precipitate was achieved by adding NH<sub>4</sub>OH until the pH reached 7 and were then rinsed and dried. The resultant TiO<sub>2</sub> precursor was annealed at 300°C for 2h under vacuum. To prepare crystalline RuO<sub>2</sub>, 0.6823 g of RuCl<sub>3</sub>·xH<sub>2</sub>O was dissolved in 250 ml of D.I. water with vigorous stirring to form a dark-brown solution with vigorous stirring, followed by the addition of NH<sub>4</sub>OH until the pH reached 7. After rinsing and drying, the RuO<sub>2</sub> precursor was annealed at 600°C for 2h under vacuum. This separately prepared amorphous TiO<sub>2</sub> and crystalline RuO<sub>2</sub> were mixed together in an agate mortar in a weight ratio of 2.24:1.

## Measurements

An X-ray powder diffractometer (XRD, Rigaku) with a graphite-monochromator equipped with Cu K $\alpha$  radiation (40 kV and 40 mA) was used on the as-synthesized samples to investigate their crystal structures. The particle size and morphology were observed using field-emission scanning electron microscopy (FE-SEM, Tescan Mira 3 LMU FEG, 20kV) and transmission electron microscopy (TEM, Tecnai G2 T-20S, FEI) equipped with energy-dispersive X-ray spectroscopy (EDS). Raman spectroscopy was performed using NT-MDT NTEGRA Spectra C. High-resolution X-ray diffraction (HR-XRD) measurements were performed using a Rigaku SmartLab with Cu radiation (9kW).

The cathode was fabricated by spreading the as-synthesized sample with a binder (PTFE, poly-(tetrafluoroethylene)) on a circular disk of SUS (steel use stainless) mesh with diameter of 11 mm, which is a gas diffusion layer as well as a current collector. The weight ratio of the sample and PTFE was 8:2. The solvent was a mixture of isopropanol and deionized water (1:1 v/v). The total mass loading of the cathode (*a*-TiO<sub>2</sub>/*c*-RuO<sub>2</sub> and PTFE) was approximately 0.8 to 1 mg, and the mass of the TiO<sub>2</sub> loaded on the cathode was approximately 0.5 to 0.7 mg. The resultant cathode was dried at 120°C for 12 h under vacuum. CR2032 type coin cells were assembled in an argon-filled glove box with an electrolyte of 1 M LiTFSI in TEGDME, and Li foil as an anode material. The water concentration in the electrolyte was <30 ppm as determined by a Mettler-Toledo Karl Fischer titration. Electrochemical properties were measured by a battery cycler (WBCS-3000, WonAtech) with an applied current density of 100 mA g<sup>-1</sup>. The energy efficiency was determined as the ratio between the integrated areas of charge and discharge profiles.

## Results

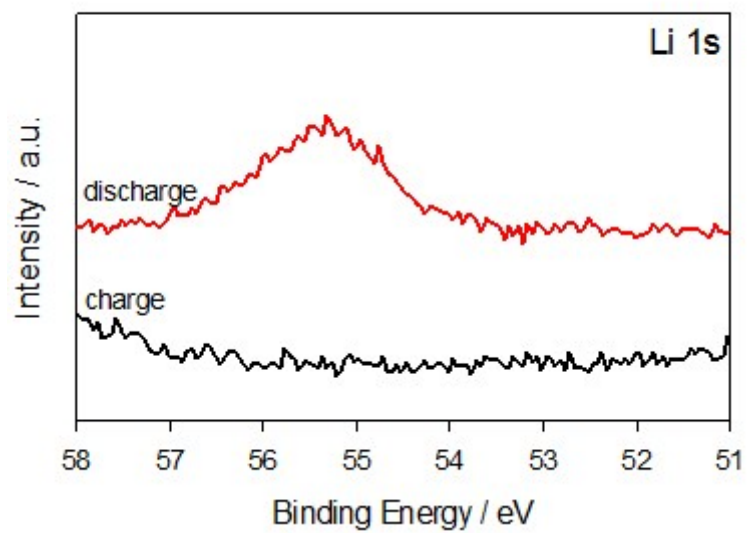

**Fig. S1** XPS Li 1s spectra after the first discharge and recharge
